# Supplementary material for: Insights into the Evolution of IncR Plasmids Found in the Southern European Clone of the Monophasic Variant of Salmonella enterica Serovar Typhimurium
Source: MDPI journal article supplement (doi:10.3390/antibiotics13040314), 2024-03-29
Supplement: s1 [file s1]

Supplementary material

## Insights into the evolution of IncR plasmids found in the Southern European clone of the monophasic variant of *Salmonella enterica* serovar Typhimurium

**Table S1.** Accession numbers of genomes of monophasic isolates of *Salmonella enterica* belonging to the Southern European clone; parameters related to the quality of the assemblies

| Isolate <sup>a</sup> | Kmer | Contigs | N50    | Longest contig<br>(bp) | Total bp<br>in contigs | Contigs<br>> 1 kb | GenBank<br>accession number |
|----------------------|------|---------|--------|------------------------|------------------------|-------------------|-----------------------------|
| LSP 6/12             | 131  | 112     | 260872 | 930160                 | 930160                 | 53                | JAJCUM000000000             |
| LSP 40/12            | 89   | 120     | 324386 | 929430                 | 4963851                | 49                | JAJCUL000000000             |
| LSP 40/13            | 131  | 188     | 324728 | 478577                 | 5061947                | 78                | JAJCUK000000000             |
| LSP 52/13            | 131  | 189     | 324746 | 929941                 | 4973925                | 56                | JAJCUJ000000000             |
| LSP 197/14           | 131  | 198     | 324887 | 930230                 | 4963683                | 51                | JAJCUI000000000             |
| LSP 64/15            | 131  | 103     | 260762 | 929941                 | 4920808                | 45                | JAJCUH000000000             |

<sup>a</sup>, Isolates are designated with the initials of the center which supplied them (Laboratorio de Salud Pública, Principality of Asturias, Spain), followed by a serial number/last two numbers of the year of recovery.

**Table S2.** Origin and accession numbers of the genomes of isolates of monophasic *Salmonella enterica* potentially belonging to the Southern European and U.S./American clones used for phylogenetic analysis in the present study

| Isolate      | Size (bp) | Source               | Country             | Isolation Year | GenBank accession No. | Reference |
|--------------|-----------|----------------------|---------------------|----------------|-----------------------|-----------|
| 08-1736      | 4,822,189 | -                    | -                   | -              | CP006602.1            | -         |
| 2011K-0052   | 4,857,411 | Human                | USA                 | 2011           | CP114540.1            | [58]      |
| ATOMSal-L6   | 4,784,174 | Swine                | South Korea         | 2019           | CP098438.1            | [59]      |
| CFSAN057258  | 4,820,861 | Water                | USA                 | 2016           | CP076086.1            | -         |
| CFSAN103852  | 4,836,001 | Environmental        | Trinidad and Tobago | 2016           | CP066328.1            | [60]      |
| CVM N18S0993 | 4,817,368 | Ground turkey        | USA                 | 2018           | CP082571.1            | [61]      |
| FDAARGOS_768 | 4,857,490 | -                    | -                   | -              | CP041005.1            | -         |
| FDAARGOS_878 | 4,874,787 | -                    | -                   | -              | CP065718.1            | -         |
| FELIX_MS205  | 4,857,968 | -                    | -                   | -              | CP139746.1            | -         |
| FSIS12032448 | 4,861,061 | Animal-Calf-Bob Veal | USA                 | 2020           | CP123684.1            | [62]      |
| HJL222       | 4,823,435 | Swine                | South Korea         | 2015           | CP098741.1            | [59]      |
| PNCS000211   | 4,789,195 | Human                | Canada              | 2010           | CP039716.1            | -         |
| PNCS007087   | 4,787,290 | Human                | Canada              | 2010           | CP044957.1            | -         |
| PNCS007098   | 4,773,032 | Human                | Canada              | 2011           | CP044967.1            | -         |
| PNCS014846   | 4,783,087 | Human                | Canada              | 2008           | CP039558.1            | -         |
| PNCS014849   | 4,815,188 | Human                | Canada              | 2008           | CP039565.1            | -         |
| PNCS014850   | 4,815,492 | Human                | Canada              | 2008           | CP039567.1            | -         |
| PNCS014853   | 4,815,118 | Human                | Canada              | 2009           | CP039713.1            | -         |
| PNCS014854   | 4,817,234 | Human                | Canada              | 2009           | CP037874.1            | -         |
| PNCS014859   | 4,814,945 | Human                | Canada              | 2010           | CP039585.1            | -         |
| PNCS015054   | 4,786,287 | Human                | Canada              | 2010           | CP037877.1            | -         |
| SAP18-6199   | 4,813,658 | -                    | USA                 | 2018           | CP040900.1            | [63]      |
| ST56         | 4,948,999 | Human                | China               | 2011           | CP050739.1            | [64]      |
| ST90         | 4,906,732 | Duck                 | China               | 2012           | CP050734.1            | [64]      |

|                      |           |                |       |      |                 |            |
|----------------------|-----------|----------------|-------|------|-----------------|------------|
| USDA-ARS-USMARC-1880 | 4,815,208 | Bovine carcass | USA   | 2003 | CP014981.1      | [65]       |
| ST1023               | 5,169,410 | Human          | Italy | 2008 | JANKYD000000000 | [21]       |
| LSP 6/12             | 4,967,484 | Human          | Spain | 2012 | JAJCUM000000000 | This study |
| LSP 40/12            | 4,966,702 | Human          | Spain | 2012 | JAJCUL000000000 | This study |
| LSP 43/13            | 5,056,065 | Human          | Spain | 2013 | JAJCUK000000000 | This study |
| LSP 52/13            | 4,975,638 | Human          | Spain | 2013 | JAJCUJ000000000 | This study |
| LSP 197/14           | 4,960,478 | Human          | Spain | 2014 | JAJCUI000000000 | This study |
| LSP 64/15            | 4,921,913 | Human          | Spain | 2015 | JAJCUH000000000 | This study |

–, information not available.

## References

21. Calia, C.; Oliva, M.; Ferrara, M.; Minervini, C.F.; Scarscia, M.; Monno, R.; Mule, G.; Cumbo, C.; Marzella, A.; Pazzani, C. Identification and characterisation of pST1023 a mosaic, multidrug-resistant and mobilisable IncR plasmid. *Microorganisms* **2022**, *10*, doi:10.3390/microorganisms10081592.
58. Leeper, M.M.; Tolar, B.M.; Griswold, T.; Vidyaprakash, E.; Hise, K.B.; Williams, G.M.; Im, S.B.; Chen, J.C.; Pouseele, H.; Carleton, H.A. Evaluation of whole and core genome multilocus sequence typing allele schemes for *Salmonella enterica* outbreak detection in a national surveillance network, PulseNet USA. *Front Microbiol* **2023**, *14*, 1254777, doi:10.3389/fmicb.2023.1254777.
59. Ji, H.J.; Jang, A.Y.; Song, J.Y.; Ahn, K.B.; Han, S.H.; Bang, S.J.; Jung, H.K.; Hur, J.; Seo, H.S. Development of live attenuated *Salmonella* Typhimurium vaccine strain using radiation mutation enhancement technology (R-MET). *Front Immunol* **2022**, *13*, 931052, doi:10.3389/fimmu.2022.931052.
60. Maguire, M.; Khan, A.S.; Adesiyun, A.A.; Georges, K.; Gonzalez-Escalona, N. Genomic comparison of eight closed genomes of multidrug-resistant *Salmonella enterica* strains isolated from broiler farms and processing plants in Trinidad and Tobago. *Front Microbiol* **2022**, *13*, 863104, doi:10.3389/fmicb.2022.863104.
61. Li, C.; Tyson, G.H.; Hsu, C.H.; Harrison, L.; Strain, E.; Tran, T.T.; Tillman, G.E.; Dessai, U.; McDermott, P.F.; Zhao, S. Long-Read Sequencing Reveals Evolution and Acquisition of Antimicrobial Resistance and Virulence Genes in *Salmonella enterica*. *Front Microbiol* **2021**, *12*, 777817, doi:10.3389/fmicb.2021.777817.
62. Ge, B.; Mukherjee, S.; Li, C.; Harrison, L.B.; Hsu, C.H.; Tran, T.T.; Whichard, J.M.; Dessai, U.; Singh, R.; Gilbert, J.M.; et al. Genomic analysis of azithromycin-resistant *Salmonella* from food animals at slaughter and processing, and retail meats, 2011-2021, United States. *Microbiol Spectr* **2024**, *12*, e0348523, doi:10.1128/spectrum.03485-23.
63. Timme, R.E.; Lafon, P.C.; Balkey, M.; Adams, J.K.; Wagner, D.; Carleton, H.; Strain, E.; Hoffmann, M.; Sabol, A.; Rand, H.; et al. Gen-FS coordinated proficiency test data for genomic foodborne pathogen surveillance, 2017 and 2018 exercises. *Sci Data* **2020**, *7*, 402, doi:10.1038/s41597-020-00740-7.
64. Chen, Z.; Kuang, D.; Xu, X.; Gonzalez-Escalona, N.; Erickson, D.L.; Brown, E.; Meng, J. Genomic analyses of multidrug-resistant *Salmonella* Indiana, Typhimurium, and Enteritidis isolates using MinION and MiSeq sequencing technologies. *PLoS One* **2020**, *15*, e0235641, doi:10.1371/journal.pone.0235641.

65. Nguyen, S.V.; Harhay, D.M.; Bono, J.L.; Smith, T.P.; Fields, P.I.; Dinsmore, B.A.; Santovenia, M.; Kelley, C.M.; Wang, R.; Bosilevac, J.M.; et al. Complete and Closed Genome Sequences of 10 *Salmonella enterica* subsp. *enterica* Seroovar Anatum Isolates from Human and Bovine Sources. *Genome Announc* **2016**, *4*, doi:10.1128/genomeA.00447-16.

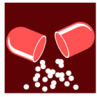

**Table S3.** Pairwise distance matrix calculated from SNP in the genomes of monophasic isolates of *Salmonella enterica*, potentially belonging to the Southern European and the U.S./American clones and derived from different sources and countries.

|                      | 08-1736 | 2011K-0052 | ATOMSal-L6 | CFSAN057258 | CFSAN103852 | CVM_N18S0993 | FDAARGOS_768 | FDAARGOS_878 | FELIX_MS205 | FSIS12032448 | HJL222 | LSP 197/14 | LSP 40/12 | LSP 40/13 | LSP 52/13 | LSP 64/15 | LSP 6/12 | PNC0000211 | PNC0007087 | PNC0007098 | PNC0014846 | PNC0014849 | PNC0014850 | PNC0014853 | PNC0014854 | PNC0014859 | PNC0015054 | SAP18-6199 | ST56 | ST90 | USDA-ARS-USMARC-1880 | ST1023 |
|----------------------|---------|------------|------------|-------------|-------------|--------------|--------------|--------------|-------------|--------------|--------|------------|-----------|-----------|-----------|-----------|----------|------------|------------|------------|------------|------------|------------|------------|------------|------------|------------|------------|------|------|----------------------|--------|
| 08-1736              | 0       | 53         | 663        | 574         | 47          | 61           | 536          | 550          | 546         | 576          | 655    | 758        | 760       | 769       | 758       | 766       | 755      | 60         | 66         | 65         | 57         | 46         | 63         | 49         | 49         | 756        | 58         | 735        | 653  | 647  | 579                  | 755    |
| 2011K-0052           | 53      | 0          | 674        | 585         | 58          | 72           | 547          | 561          | 557         | 587          | 666    | 763        | 767       | 776       | 763       | 771       | 760      | 71         | 77         | 76         | 68         | 57         | 74         | 60         | 60         | 765        | 69         | 744        | 664  | 658  | 590                  | 762    |
| ATOMSal-L6           | 663     | 674        | 0          | 465         | 668         | 670          | 155          | 167          | 163         | 467          | 8      | 655        | 657       | 666       | 655       | 663       | 652      | 669        | 675        | 672        | 666        | 655        | 666        | 658        | 666        | 657        | 667        | 636        | 249  | 243  | 510                  | 652    |
| CFSAN057258          | 574     | 585        | 465        | 0           | 579         | 581          | 338          | 352          | 348         | 106          | 457    | 608        | 610       | 619       | 608       | 616       | 605      | 580        | 586        | 583        | 577        | 566        | 577        | 569        | 579        | 602        | 578        | 577        | 455  | 449  | 119                  | 605    |
| CFSAN103852          | 47      | 58         | 668        | 579         | 0           | 66           | 541          | 555          | 551         | 581          | 660    | 761        | 763       | 772       | 761       | 769       | 758      | 65         | 71         | 70         | 62         | 51         | 68         | 54         | 54         | 761        | 63         | 740        | 658  | 652  | 584                  | 758    |
| CVM_N18S0993         | 61      | 72         | 670        | 581         | 66          | 0            | 543          | 557          | 553         | 583          | 662    | 763        | 765       | 774       | 763       | 771       | 760      | 61         | 67         | 66         | 58         | 15         | 60         | 18         | 68         | 763        | 59         | 742        | 660  | 654  | 586                  | 760    |
| FDAARGOS_768         | 536     | 547        | 155        | 338         | 541         | 543          | 0            | 14           | 10          | 340          | 147    | 530        | 532       | 541       | 530       | 538       | 527      | 542        | 548        | 545        | 539        | 528        | 539        | 531        | 539        | 530        | 540        | 509        | 145  | 139  | 383                  | 527    |
| FDAARGOS_878         | 550     | 561        | 167        | 352         | 555         | 557          | 14           | 0            | 20          | 354          | 159    | 540        | 542       | 551       | 540       | 548       | 537      | 556        | 562        | 559        | 553        | 542        | 553        | 545        | 553        | 542        | 554        | 521        | 157  | 151  | 397                  | 537    |
| FELIX_MS205          | 546     | 557        | 163        | 348         | 551         | 553          | 10           | 20           | 0           | 350          | 155    | 540        | 542       | 551       | 540       | 548       | 537      | 552        | 558        | 555        | 549        | 538        | 549        | 541        | 549        | 540        | 550        | 519        | 153  | 147  | 393                  | 537    |
| FSIS12032448         | 576     | 587        | 467        | 106         | 581         | 583          | 340          | 354          | 350         | 0            | 459    | 598        | 600       | 609       | 598       | 606       | 595      | 582        | 588        | 585        | 579        | 568        | 579        | 571        | 581        | 598        | 580        | 573        | 457  | 451  | 151                  | 595    |
| HJL222               | 655     | 666        | 8          | 457         | 660         | 662          | 147          | 159          | 155         | 459          | 0      | 647        | 649       | 658       | 647       | 655       | 644      | 661        | 667        | 664        | 658        | 647        | 658        | 650        | 658        | 649        | 659        | 628        | 241  | 235  | 502                  | 644    |
| LSP 197/14           | 758     | 763        | 655        | 608         | 761         | 763          | 530          | 540          | 540         | 598          | 647    | 0          | 52        | 61        | 0         | 34        | 5        | 762        | 768        | 765        | 759        | 748        | 759        | 751        | 761        | 514        | 760        | 513        | 643  | 637  | 567                  | 45     |
| LSP 40/12            | 760     | 767        | 657        | 610         | 763         | 765          | 532          | 542          | 542         | 600          | 649    | 52         | 0         | 19        | 52        | 60        | 49       | 764        | 770        | 767        | 761        | 750        | 761        | 753        | 763        | 518        | 762        | 517        | 645  | 639  | 569                  | 39     |
| LSP 40/13            | 769     | 776        | 666        | 619         | 772         | 774          | 541          | 551          | 551         | 609          | 658    | 61         | 19        | 0         | 61        | 69        | 58       | 773        | 779        | 776        | 770        | 759        | 770        | 762        | 772        | 527        | 771        | 526        | 654  | 648  | 578                  | 48     |
| LSP 52/13            | 758     | 763        | 655        | 608         | 761         | 763          | 530          | 540          | 540         | 598          | 647    | 0          | 52        | 61        | 0         | 34        | 5        | 762        | 768        | 765        | 759        | 748        | 759        | 751        | 761        | 514        | 760        | 513        | 643  | 637  | 567                  | 45     |
| LSP 64/15            | 766     | 771        | 663        | 616         | 769         | 771          | 538          | 548          | 548         | 606          | 655    | 34         | 60        | 69        | 34        | 0         | 31       | 770        | 776        | 773        | 767        | 756        | 767        | 759        | 769        | 522        | 768        | 521        | 651  | 645  | 575                  | 53     |
| LSP 6/12             | 755     | 760        | 652        | 605         | 758         | 760          | 527          | 537          | 537         | 595          | 644    | 5          | 49        | 58        | 5         | 31        | 0        | 759        | 765        | 762        | 756        | 745        | 756        | 748        | 758        | 511        | 757        | 510        | 640  | 634  | 564                  | 42     |
| PNC0000211           | 60      | 71         | 669        | 580         | 65          | 61           | 542          | 556          | 552         | 582          | 661    | 762        | 764       | 773       | 762       | 770       | 759      | 0          | 16         | 15         | 7          | 46         | 63         | 49         | 67         | 762        | 8          | 741        | 659  | 653  | 585                  | 759    |
| PNC0007087           | 66      | 77         | 675        | 586         | 71          | 67           | 548          | 562          | 558         | 588          | 667    | 768        | 770       | 779       | 768       | 776       | 765      | 16         | 0          | 19         | 11         | 52         | 69         | 55         | 73         | 768        | 12         | 747        | 665  | 659  | 591                  | 765    |
| PNC0007098           | 65      | 76         | 672        | 583         | 70          | 66           | 545          | 559          | 555         | 585          | 664    | 765        | 767       | 776       | 765       | 773       | 762      | 15         | 19         | 0          | 10         | 51         | 68         | 54         | 72         | 765        | 9          | 744        | 662  | 656  | 588                  | 762    |
| PNC0014846           | 57      | 68         | 666        | 577         | 62          | 58           | 539          | 553          | 549         | 579          | 658    | 759        | 761       | 770       | 759       | 767       | 756      | 7          | 11         | 10         | 0          | 43         | 58         | 46         | 64         | 759        | 3          | 738        | 656  | 650  | 582                  | 756    |
| PNC0014849           | 46      | 57         | 655        | 566         | 51          | 15           | 528          | 542          | 538         | 568          | 647    | 748        | 750       | 759       | 748       | 756       | 745      | 46         | 52         | 51         | 43         | 0          | 45         | 3          | 53         | 748        | 44         | 727        | 645  | 639  | 571                  | 745    |
| PNC0014850           | 63      | 74         | 666        | 577         | 68          | 60           | 539          | 553          | 549         | 579          | 658    | 759        | 761       | 770       | 759       | 767       | 756      | 63         | 69         | 68         | 58         | 45         | 0          | 48         | 68         | 759        | 61         | 738        | 656  | 650  | 582                  | 756    |
| PNC0014853           | 49      | 60         | 658        | 569         | 54          | 18           | 531          | 545          | 541         | 571          | 650    | 751        | 753       | 762       | 751       | 759       | 748      | 49         | 55         | 54         | 46         | 3          | 48         | 0          | 56         | 751        | 47         | 730        | 648  | 642  | 574                  | 748    |
| PNC0014854           | 49      | 60         | 666        | 579         | 54          | 68           | 539          | 553          | 549         | 581          | 658    | 761        | 763       | 772       | 761       | 769       | 758      | 67         | 73         | 72         | 64         | 53         | 68         | 56         | 0          | 759        | 65         | 738        | 656  | 650  | 584                  | 758    |
| PNC0014859           | 756     | 765        | 657        | 602         | 761         | 763          | 530          | 542          | 540         | 598          | 649    | 514        | 518       | 527       | 514       | 522       | 511      | 762        | 768        | 765        | 759        | 748        | 759        | 751        | 759        | 0          | 760        | 512        | 647  | 641  | 561                  | 511    |
| PNC0015054           | 58      | 69         | 667        | 578         | 63          | 59           | 540          | 554          | 550         | 580          | 659    | 760        | 762       | 771       | 760       | 768       | 757      | 8          | 12         | 9          | 3          | 44         | 61         | 47         | 65         | 760        | 0          | 739        | 657  | 651  | 583                  | 757    |
| SAP18-6199           | 735     | 744        | 636        | 577         | 740         | 742          | 509          | 521          | 519         | 573          | 628    | 513        | 517       | 526       | 513       | 521       | 510      | 741        | 747        | 744        | 738        | 727        | 738        | 730        | 738        | 512        | 739        | 0          | 626  | 620  | 538                  | 512    |
| ST56                 | 653     | 664        | 249        | 455         | 658         | 660          | 145          | 157          | 153         | 457          | 241    | 643        | 645       | 654       | 643       | 651       | 640      | 659        | 665        | 662        | 656        | 645        | 656        | 648        | 656        | 647        | 657        | 626        | 0    | 66   | 500                  | 640    |
| ST90                 | 647     | 658        | 243        | 449         | 652         | 654          | 139          | 151          | 147         | 451          | 235    | 637        | 639       | 648       | 637       | 645       | 634      | 653        | 659        | 656        | 650        | 639        | 650        | 642        | 650        | 641        | 651        | 620        | 66   | 0    | 494                  | 634    |
| USDA-ARS-USMARC-1880 | 579     | 590        | 510        | 119         | 584         | 586          | 383          | 397          | 393         | 151          | 502    | 567        | 569       | 578       | 567       | 575       | 564      | 585        | 591        | 588        | 582        | 571        | 582        | 574        | 584        | 561        | 583        | 538        | 500  | 494  | 0                    | 564    |
| ST1023               | 755     | 762        | 652        | 605         | 758         | 760          | 527          | 537          | 537         | 595          | 644    | 45         | 39        | 48        | 45        | 53        | 42       | 759        | 765        | 762        | 756        | 745        | 756        | 748        | 758        | 511        | 757        | 512        | 640  | 634  | 564                  | 0      |

Min:0; max:779
